# Supplementary material for: Data for Database as a General Manuscript Index
Source: Hindawi journal article supplement (doi:10.1155/2020/5692829), 1987-12-01
Supplement: f1 [file 5692829.f1.pdf]

## Supplementary Materials

**Figure S1. Effect of CCL2, CX3L1 and IFN- $\gamma$  on migration of monocytes.** HUVECs were grown overnight on 1% gelatin-coated porous membranes in a Transwell chamber (Corning Inc, Cambridge, Massachusetts, USA) with a 6.5-mm diameter and 5 $\mu$ m-pore size. In the lower chamber were added individually concentrations of CCL2 (5, 7.5 and 10 ng/ml), CX3CL1 (25, 50 and 100 ng/ml) and IFN- $\gamma$  (25, 50 and 100 ng/ml), culture medium alone was used as a negative control. In the assay of IFN- $\gamma$  was used CCL2 as a positive control. Peripheral blood mononuclear cells were obtained from buffy coats and total monocytes 3 $\times$ 10<sup>5</sup> (obtained with Pan Monocyte Isolation Kit from Miltenyi Biotec, Bergisch Gladbach, German) in 50  $\mu$ l medium were added to the upper chamber. After 3 h, the migrating monocytes were recovered and quantitated by flow cytometry, n=6. \* p < 0.05.

## **Figure S2. Assay of IL-17 and IFN- $\gamma$ on monocytes**

Peripheral blood mononuclear cells were obtained from buffy coats and total monocytes 3 $\times$ 10<sup>5</sup> (obtained with Pan Monocyte Isolation Kit from Miltenyi Biotec, Bergisch Gladbach, German) were treated with IL-17 (15, 30 and 60 ng/ml) for 24 hours at 37°C. Alternatively, total monocytes were treated with 15, 20 and 25 ng/ml IFN- $\gamma$  for 24 hours at 37°C. As a negative control the monocytes were cultured only with culture medium. The concentrations of IL-6 in the culture supernatants of monocytes were determined by ELISA, according to the manufacturer's instructions, n=6. \*p < 0.05.

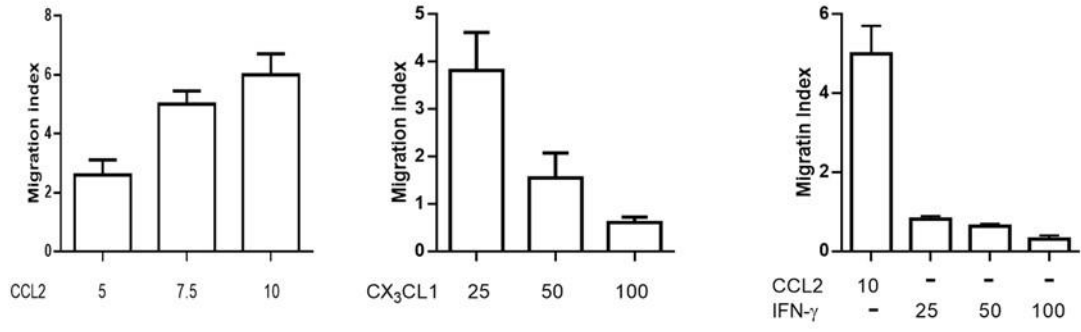

**Figure S1**

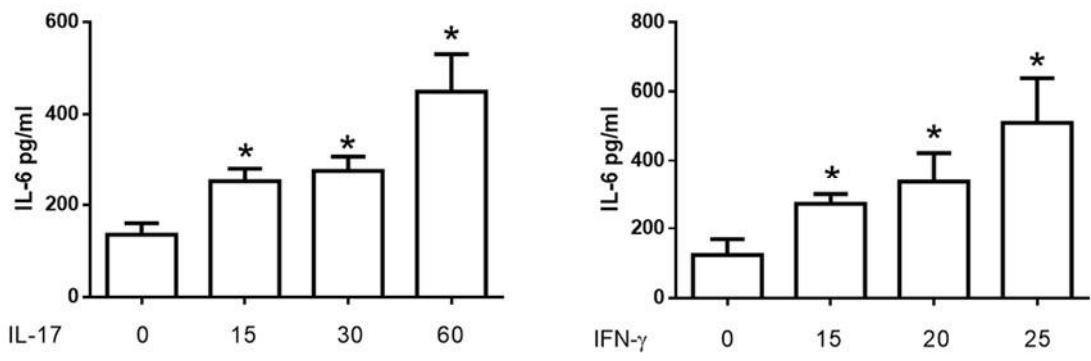

**Figure S2**
